# Supplementary material
Source: Springer Nature journal article supplement (https://www.springermedizin.de/resource/supplementary/12889_2012_5202_MOESM1_ESM.pdf/9494804)

**Number of tuberculosis cases**

**Tuberculosis notification rate (per 100000 inhabitants)**

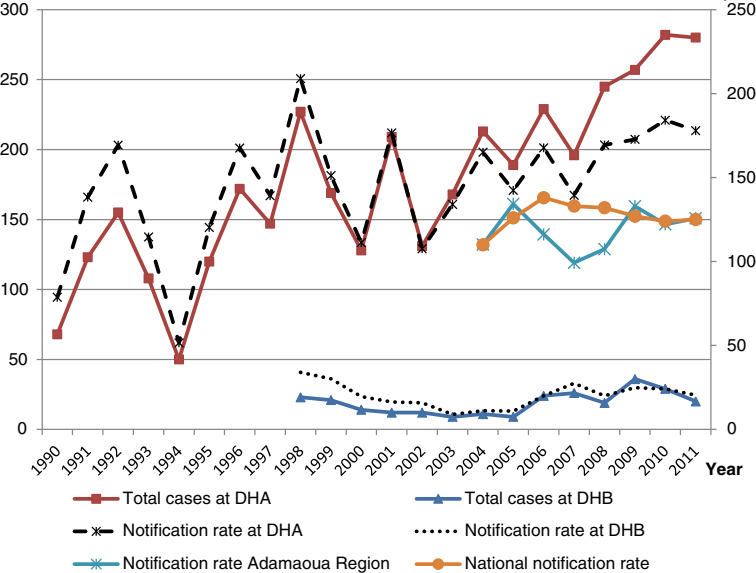

Supplement: MOESM1 [file 9494804]
